# Supplementary material
Source: PubMed Central journal article supplement (PMC5537605)

## Endometrioid Endometrial Adenocarcinomas

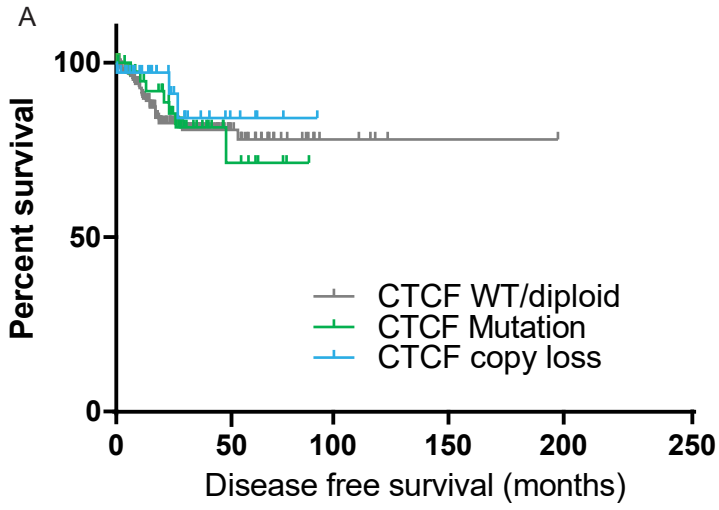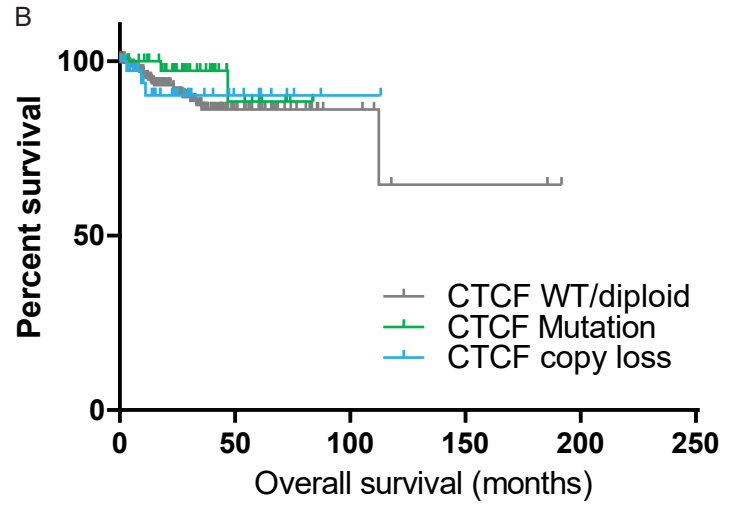

## Serous Endometrial Carcinomas

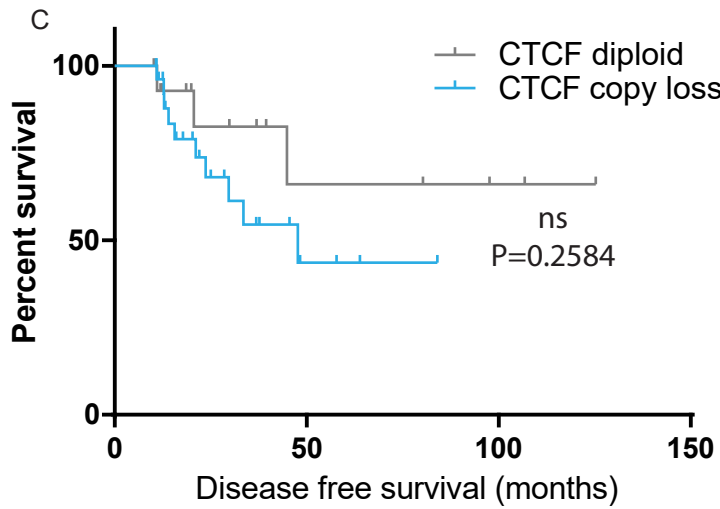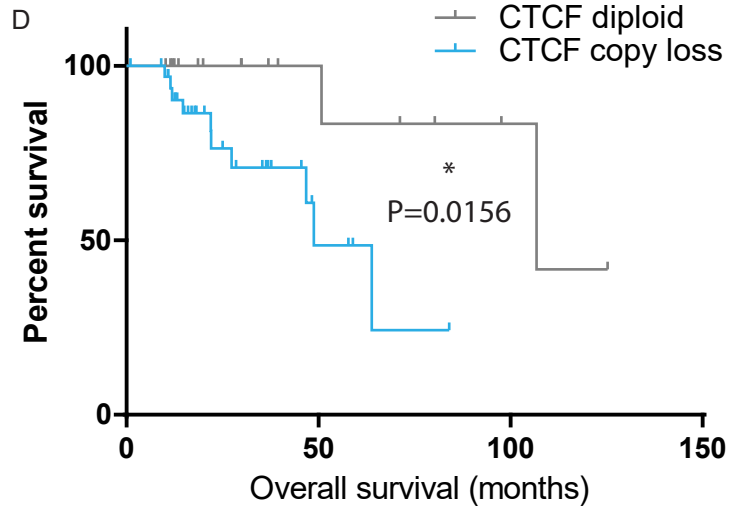

Supplement: onc201725x2.pdf [file onc201725x2.pdf]
