# Supplementary material
Source: PubMed Central journal article supplement (PMC5537605)

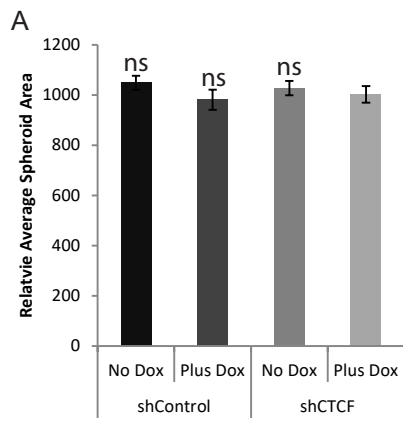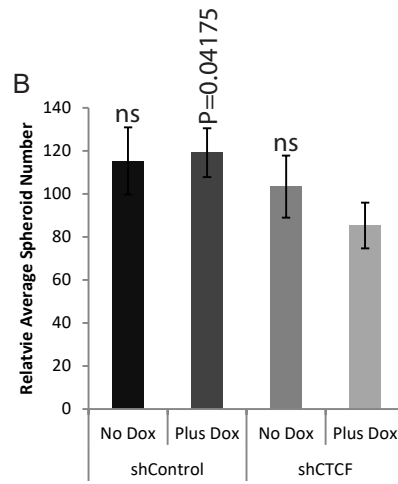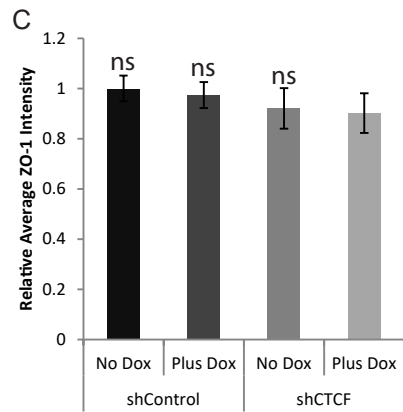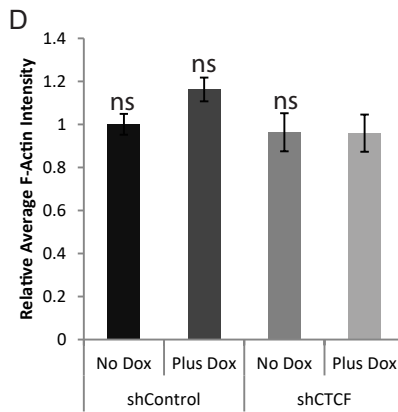

Supplement: onc201725x3.pdf [file onc201725x3.pdf]
